# Supplementary material
Source: publisher figshare collection journal article supplement (https://gsapubs.figshare.com/ndownloader/files/23320679)
Supplement: Supplementary file 1 [file 23320679]

## Sheet: Sheet1
Table DR3: Compilation of Palaeozoic geochronological data from the Arunta Region
Location	Age (Ma)	Error (Ma)	Geochronology method	Reference	Type of process	Type of rock
West Bore Shear Zone, Strangways Range	381	7	Sm-Nd Grt core-Grt rim-leucocratic halo isochron	Ballèvre et al., 2000	Metamorphic	Amphibolite
Winnecke region, S Strangways Range	312	18	Sm-Nd Grt-St-Bt-WR isochron	Bendall et al., 1998; Bendall, 2000	Metamorphic	Amphibolite
Winnecke region, S Strangways Range	322	7	Sm-Nd Grt-St-Bt-WR isochron	Bendall et al., 1998; Bendall, 2000	Metamorphic	Micaschist
Mallee Bore, N Harts Range	384	7	SHRIMP U-Pb Ttn	Buick et al., 2001	Metamorphic	Granulite metabasite migmatite
Mallee Bore, N Harts Range	457	5	SHRIMP U-Pb Mnz	Buick et al., 2001	Metamorphic	Granulite metapelite migmatite
Mallee Bore, N Harts Range	387	4	SHRIMP U-Pb Zrc overgrowths	Buick et al., 2001	Igneous	Weakly deformed granite
Brett Creek, N Harts Range	327	3	SHRIMP U-Pb Mnz	Buick et al., 2008	Igneous	Deformed leucogneiss
Brett Creek, N Harts Range	454.7	4.2	SHRIMP U-Pb Zrc	Buick et al., 2008	Igneous	Deformed leucogneiss
Brett Creek, N Harts Range	453.9	5	SHRIMP U-Pb Zrc	Buick et al., 2008	Igneous	Deformed leucogneiss
Brett Creek, N Harts Range	453.8	8.7	SHRIMP U-Pb Mnz	Buick et al., 2008	Igneous	Deformed leucogneiss
Brett Creek, N Harts Range	363.9	8.2	SHRIMP U-Pb Mnz	Buick et al., 2008	Igneous	Deformed leucogneiss
Brett Creek, N Harts Range	392	16	SHRIMP U-Pb Mnz	Buick et al., 2008	Igneous	Deformed leucogneiss
Brett Creek, N Harts Range	376	16	SHRIMP U-Pb Mnz	Buick et al., 2008	Igneous	Deformed leucogneiss
Brett Creek, N Harts Range	385.5	6.2	SHRIMP U-Pb Mnz	Buick et al., 2008	Igneous	Deformed leucogneiss
Brett Creek, N Harts Range	399	18	SHRIMP U-Pb Mnz	Buick et al., 2008	Igneous	Deformed leucogneiss
Brett Creek, N Harts Range	383	15	SHRIMP U-Pb Mnz	Buick et al., 2008	Igneous	Deformed leucogneiss
Brett Creek, N Harts Range	380	16	SHRIMP U-Pb Mnz	Buick et al., 2008	Igneous	Deformed leucogneiss
Brett Creek, N Harts Range	389	14	SHRIMP U-Pb Mnz	Buick et al., 2008	Igneous	Deformed leucogneiss
Brett Creek, N Harts Range	348	10	SHRIMP U-Pb Zrc	Buick et al., 2008	Igneous	Undeformed pegmatite
Brett Creek, N Harts Range	341	3.5	SHRIMP U-Pb Mnz	Buick et al., 2008	Igneous	Undeformed pegmatite
Brett Creek, N Harts Range	324.1	5	SHRIMP U-Pb Mnz	Buick et al., 2008	Igneous	Undeformed pegmatite
Brett Creek, N Harts Range	319.9	4.4	SHRIMP U-Pb Mnz	Buick et al., 2008	Igneous	Undeformed pegmatite
Brett Creek, N Harts Range	312.9	4.8	SHRIMP U-Pb Mnz	Buick et al., 2008	Igneous	Undeformed pegmatite
Harts Range	360.8	2.3	SHRIMP U-Pb Mnz	Buick et al., 2008	Igneous	Undeformed pegmatite
Harts Range	454.4	7.6	SHRIMP U-Pb Zrc	Buick et al., 2008	Igneous	Deformed pegmatite
Harts Range	439	14	SHRIMP U-Pb Zrc	Buick et al., 2008	Igneous	Deformed pegmatite
Harts Range	437.6	5.8	SHRIMP U-Pb Mnz	Buick et al., 2008	Igneous	Undeformed pegmatite
Harts Range	414.9	5.7	SHRIMP U-Pb Mnz	Buick et al., 2008	Igneous	Undeformed pegmatite
Harts Range	447.5	6.9	SHRIMP U-Pb Mnz	Buick et al., 2008	Igneous	Deformed pegmatite
Harts Range	320	5.8	SHRIMP U-Pb Mnz	Buick et al., 2008	Igneous	Undeformed pegmatite
Harts Range	420.3	8	SHRIMP U-Pb Mnz	Buick et al., 2008	Igneous	Weakly deformed pegmatite
Harts Range	425	11	SHRIMP U-Pb Mnz	Buick et al., 2008	Igneous	Undeformed pegmatite
Entia Gneiss Complex	334	15	SHRIMP U-Pb Zrc	Buick et al., 2008	Igneous	Undeformed pegmatite
Harts Range	335.1	9.1	SHRIMP U-Pb Zrc	Buick et al., 2008	Igneous	Undeformed pegmatite
Sandy Creek granites	334.1	2.6	Ar-Ar Ms	Cartwright et al., 1999	Metamorphic	Sheared granites
Sandy Creek granites	333.4	2	Ar-Ar Ms	Cartwright et al., 1999	Metamorphic	Sheared granites
Sandy Creek granites	333.9	2	Ar-Ar Ms	Cartwright et al., 1999	Metamorphic	Sheared granites
Sandy Creek granites	334.5	3.5	Ar-Ar Ms	Cartwright et al., 1999	Metamorphic	Sheared granites
E Entia Dome	360	5	U–Pb Mnz	Cooper et al., 1988	Igneous	Injected Leucogneiss
Ruby Gap	340.1	3.5	K-Ar Phg	Dunlap et al., 1991	Metamorphic	Granitic gneiss
Ruby Gap	413.5	4.3	K-Ar Phg	Dunlap et al., 1991	Metamorphic	Granitic gneiss
Ruby Gap	311.5	0.4	Ar-Ar Phg	Dunlap et al., 1991	Metamorphic	Quartzite mylonites
Ruby Gap	318.1	0.6	Ar-Ar Phg	Dunlap et al., 1991	Metamorphic	Quartzite mylonites
Ruby Gap	321.7	0.5	Ar-Ar Phg	Dunlap et al., 1991	Metamorphic	Quartzite mylonites
Ruby Gap	328.2	0.5	Ar-Ar Phg	Dunlap et al., 1991	Metamorphic	Quartzite mylonites
Ruby Gap	317.8	5	K-Ar Phg	Dunlap et al., 1991	Metamorphic	Quartzite mylonites
Ruby Gap	375.85	3.9	K-Ar Phg	Dunlap et al., 1991	Metamorphic	Quartzite mylonites
Mallee Bore, N Harts Range	353	14	Sm-Nd Grt-Hbl isochron	Hand and Mawby, unpublished data	Metamorphic	Schists and Metamorphosed mafic rocks
Mallee Bore, N Harts Range	357	17	Sm-Nd Grt-Hbl isochron	Hand and Mawby, unpublished data	Metamorphic	Schists and Metamorphosed mafic rocks
E Entia Gneiss Complex	415	4	Sm-Nd Grt-WR isochron	Hand and Mawby, unpublished data	Metamorphic	Schists and Metamorphosed mafic rocks
E Entia Gneiss Complex	442	9	Sm-Nd Grt-WR isochron	Hand and Mawby, unpublished data	Metamorphic	Schists and Metamorphosed mafic rocks
E Entia Gneiss Complex	444	4	Sm-Nd Grt-WR isochron	Hand and Mawby, unpublished data	Metamorphic	Schists and Metamorphosed mafic rocks
Oonagalabi, Harts Range	372	5	Sm-Nd Grt-Hbl-WR isochron	Hand and Mawby, unpublished data	Metamorphic	Schists and Metamorphosed mafic rocks
Oonagalabi, Harts Range	376	6	Sm-Nd Grt-Hbl-WR isochron	Hand and Mawby, unpublished data	Metamorphic	Schists and Metamorphosed mafic rocks
Yamba Shear Zone, Strangways Range	384	5	Sm-Nd Grt-Hbl-St isochron	Hand and Mawby, unpublished data	Metamorphic	Schists and Metamorphosed mafic rocks
Oonagalabi, Harts Range	444	4	Sm-Nd Grt-Bt-WR isochron	Hand and Mawby, unpublished data	Metamorphic	Schists and Metamorphosed mafic rocks
SE Entia Gneiss Complex	343	8	SHRIMP U-Pb Mnz	Hand et al., 1999	Metamorphic	Metapelite
SE Entia Gneiss Complex	330	6	SHRIMP U-Pb Zrc overgrowths	Hand et al., 1999	Igneous	Deformed pegmatite
Yambah Shear Zone, Strangways Range	448	5	LA-ICP-MS U-Pb Mnz	Howlett et al., 2015	Metamorphic	Grt-St-Ky schist
Yambah Shear Zone, Strangways Range	374	3	LA-ICP-MS U-Pb Mnz	Howlett et al., 2015	Metamorphic	Grt-St-Ky schist
Yambah Shear Zone, Strangways Range	363	3	LA-ICP-MS U-Pb Mnz	Howlett et al., 2015	Metamorphic	Grt-St-Ky schist
Yambah Shear Zone, Strangways Range	355	3	LA-ICP-MS U-Pb Mnz	Howlett et al., 2015	Metamorphic	Grt-St-Ky schist
Yambah Shear Zone, Strangways Range	384	5	Sm-Nd Grt isochron	Howlett et al., 2015	Metamorphic	Grt-St-Ky schist
Gough Dam Shear Zone, Strangways Range	441	6	LA-ICP-MS U-Pb Mnz	Howlett et al., 2015	Metamorphic	Amphibolite
Gough Dam Shear Zone, Strangways Range	350	5	LA-ICP-MS U-Pb Mnz	Howlett et al., 2015	Metamorphic	Grt-Bt-Ms schist
Cattlewater Pass, Strangways Range	454	3	LA-ICP-MS U-Pb Mnz	Howlett et al., 2015	Metamorphic	Grt-Sil schist
Oonagalabi, Strangways Range	448	4	LA-ICP-MS U-Pb Mnz	Howlett et al., 2015	Metamorphic	Grt-Bt ± Sil and Grt-Hbl annealed mylonitic gneiss
Oonagalabi, Strangways Range	449	3	LA-ICP-MS U-Pb Mnz	Howlett et al., 2015	Metamorphic	Grt-Bt ± Sil and Grt-Hbl annealed mylonitic gneiss
Oonagalabi, Strangways Range	376	4	Sm-Nd Grt isochron	Howlett et al., 2015	Metamorphic	Grt-Bt ± Sil and Grt-Hbl annealed mylonitic gneiss
Oonagalabi, Strangways Range	372	5	Sm-Nd Grt isochron	Howlett et al., 2015	Metamorphic	Grt-Bt ± Sil and Grt-Hbl annealed mylonitic gneiss
Oonagalabi, Strangways Range	379	20	Sm-Nd Grt isochron	Howlett et al., 2015	Metamorphic	Grt-Bt ± Sil and Grt-Hbl annealed mylonitic gneiss
Oonagalabi, Strangways Range	444	4	Sm-Nd Grt isochron	Howlett et al., 2015	Metamorphic	Grt-Bt ± Sil and Grt-Hbl annealed mylonitic gneiss
Oonagalabi, Strangways Range	440	15	Sm-Nd Grt isochron	Howlett et al., 2015	Metamorphic	Grt-Bt ± Sil and Grt-Hbl annealed mylonitic gneiss
Pinnacles Bore Shear Zone, Strangways Range	350	3	LA-ICP-MS U-Pb Mnz	Howlett et al., 2015	Metamorphic	Grt-St-Ky schist
Pinnacles Bore Shear Zone, Strangways Range	359	2	LA-ICP-MS U-Pb Mnz	Howlett et al., 2015	Metamorphic	Grt-St-Ky schist
Pinnacles Bore Shear Zone, Strangways Range	326	13	Sm-Nd Grt isochron	Howlett et al., 2015	Metamorphic	Grt-St-Ky schist
Erontonga Shear Zone, Strangways Range	334	5	Sm-Nd Grt isochron	Howlett et al., 2015	Metamorphic	Grt-Bt-Ms schist
Ongeva region, Strangways Range	445	11	LA-ICP-MS U-Pb Mnz	Howlett et al., 2015	Metamorphic	Grt bearing pelitic ultramylonite
Nolans Bore	345.3	0.8	Ar-Ar Ms	Huston et al., 2016	Metamorphic	Mylonitic gneiss band
Nolans Bore	367.2	0.75	Ar-Ar Bt	Huston et al., 2016	Metamorphic	Mylonitic gneiss band
Nolans Bore	375.9	0.8	Ar-Ar Bt	Huston et al., 2016	Metamorphic	Granitic gneiss
Coggan Bore, Harts Range	364.3	5.8	ID-TIMS U-Pb Ttn	Lavery, 2003	Metamorphic	Calcsilicate
Harts Range Detachment Zone	365.3	0.8	MC-ICP-MS U-Pb Ttn	Lavery, 2003	Metamorphic	Calcsilicate
Brady Gneiss, Harts Range	412.1	0.6	ID-TIMS U-Pb Ttn	Lavery, 2003	Metamorphic	Calcsilicate
Kong Bore, Harts Range	416.3	0.6	ID-TIMS U-Pb Ttn	Lavery, 2003	Metamorphic	Calcsilicate
Brady Gneiss, Harts Range	417	0.7	ID-TIMS U-Pb Ttn	Lavery, 2003	Metamorphic	Calcsilicate
Strangways Range	332	3	SHRIMP U-Pb Zrc overgrowths	Maidment et al., 2005	Igneous	Granodiorite
Lower Stanovos Gneiss, Harts Range	452.8	4.3	SHRIMP U-Pb Zrc overgrowths	Maidment et al., 2013	Metamorphic	Quartzite
Lower Irinda Gneiss, Harts Range	365	10	SHRIMP U-Pb Zrc	Maidment et al., 2013	Metamorphic	Grt-Sil metapelite migmatite
Upper Brady Gneiss, Harts Range	359	6	SHRIMP U-Pb Zrc overgrowths	Maidment et al., 2013	Metamorphic	Calcsilicate
Upper Brady Gneiss, Harts Range	361	5	SHRIMP U-Pb Zrc overgrowths	Maidment et al., 2013	Metamorphic	Calcsilicate
Upper Brady Gneiss, Harts Range	379	5	SHRIMP U-Pb Zrc overgrowths	Maidment et al., 2013	Metamorphic	Calcsilicate
InkaMslla Bore, Entia Dome	336	4	SHRIMP U-Pb Mnz	Maidment, 2005	Metamorphic	Ky-Bt-Ms-Grt metapelite
Huckitta Gorge, Entia Gneiss Complex	357	4	SHRIMP U-Pb Zrc	Maidment, 2005	Igneous	Pegmatite
Mt Mary, Entia Dome	361	3	SHRIMP U-Pb Zrc	Maidment, 2005	Igneous	Granite
Atitjere, Brady Gneiss	361	3	SHRIMP U-Pb Zrc	Maidment, 2005	Igneous	Granite
Painted Canyon	375	4	SHRIMP U-Pb Zrc	Maidment, 2005	Igneous	Pegmatite
Detachment Zone, Entia Gneiss Complex	449	10	Sm-Nd Hbl-Grt-WR isochron	Mawby et al., 1999	Metamorphic	Gneiss
Mount Liebig	401	1	Ar-Ar Ms	McLaren et al., 2009	Metamorphic	Grt-Ms-Chl schist
Heavitree Qz (S Mount Liebig)	376	1	Ar-Ar Ms	McLaren et al., 2009	Metamorphic	Quartzite
Edwards Creek Prospect, Strangways Range	385	20	LA-ICP-MS Mnz	Moller at al., 1999a,b	Metamorphic	Metasediments, Calc-silicate, Mafic granulites and Bt-gneiss
Edwards Creek Prospect, Strangways Range	443	6	SHRIMP U-Pb Zrc rims	Moller et al., 1999a,b	Metamorphic	Metasediments, Calc-silicate, Mafic granulites and Bt-gneiss
Hart Range Irinda	343	3	Rb-Sr total rock Ms isochron	Mortimer et al., 1987	Igneous	Pegmatite
Peaked Hill Shear Zone, Reynolds Range	354	3	LA-ICP-MS U-Pb Mnz	Raimondo et al., 2012	Metamorphic	Granitic gneiss
Peaked Hill Shear Zone, Reynolds Range	360	3	LA-ICP-MS U-Pb Mnz	Raimondo et al., 2012	Metamorphic	Granitic gneiss
Peaked Hill Shear Zone, Reynolds Range	333	20	Sm-Nd Grt-Ms-Bt isochron	Raimondo et al., 2012	Metamorphic	Granitic gneiss
Nolans Bore	351.1	4.6	U–Pb Mnz	Schoneveld et al., 2015	Metamorphic	Breccia
Nolans Bore	344	10	U–Pb Mnz	Schoneveld et al., 2015	Metamorphic	Breccia
Nolans Bore	403	15	Sm–Nd allanite, apatite	Schoneveld et al., 2015	Metamorphic	Breccia
Entire Point Shear Zone	434	6	Sm-Nd Grt-Hbl-WR isochron	Scrimgeour and Raith, 2001	Metamorphic	Recrystallized mafic rocks
Entire Point Shear Zone	445	5	SHRIMP U-Pb Mnz	Scrimgeour and Raith, 2001	Metamorphic	Recrystallized mafic rocks
Huckitta Creek, SE Entia Gneiss Complex	325	8	LA-ICP-MS U-Pb Mnz lower intercept	Wade et al., 2008	Metamorphic	Grt-Hbl-two mica metapelite
W Entia Gneiss Complex	341	5	LA-ICP-MS U-Pb Mnz lower intercept	Wade et al., 2008	Metamorphic	Grt-Hbl-two mica metapelite
Bt, biotite; Chl, chlorite; Grt, garnet; Hbl, hornblende; Ky, kyanite; Mnz, monazite; Ms, muscovite; Phg, phengite; Sil, silimanite; St, staurolite; Ttn, titanite; WR, whole rock; Zrc, zircon

## Sheet: Sheet2
References
Ballèvre, M., Möller, A. and Hensen, B.J., 2000. Exhumation of the lower crust during crustal shortening: an Alice Springs (380 Ma) age for a prograde amphibolite facies shear zone in the Strangways Metamorphic Complex (central Australia). Journal of Metamorphic Geology, 18(6): 737-747.
Bendall, B., 2000. Mid-Palaeozoic shear zones in the Strangways Range: a record of intracratonic tectonism in the Arunta Inlier, central Australia. University of Adelaide, PhD thesis.
Bendall, B., Hand, M. and Foden, J., 1998. Sm-Nd evidence for mid-Palaeozoic regional amphibolite facies metamorphism in the Strangways Range, central Australia. Geological Society of Australia Abstracts, 49: 27.
Buick, I.S., Miller, J.A., Williams, I.S. and Cartwright, I., 2001. Ordovician high-grade metamorphism of a newly recognised late Neoproterozoic terrane in the northern Harts Range, central Australia. Journal of Metamorphic Geology, 19(4): 373-394.
Buick, I.S., Storkey, A. and Williams, I.S., 2008. Timing relationships between pegmatite emplacement, metamorphism and deformation during the intra-plate Alice Springs Orogeny, central Australia. Journal of Metamorphic Geology, 26(9): 915-936.
Cartwright, I., Buick, I. S., Foster, D. A., & Lambert, D. D. 1999. Alice Springs age shear zones from the southeastern Reynolds Range, central Australia. Australian Journal of Earth Sciences, 46(3): 355-363.
Cooper, J.A., Mortimer, G.E. and James, P.R., 1988. Rate of Arunta Inlier evolution at the eastern margin of the Entia Dome, central Australia. Precambrian Research, 40–41(0): 217-231.
Dunlap, W. J., Teyssier, C., McDougall, I., & Baldwin, S. 1991. Ages of deformation from K/Ar and 40Ar/39Ar dating of white micas. Geology, 19(12): 1213-1216.
Hand, M., Mawby, J., Kinny, P.D. and Foden, J., 1999. U-Pb ages from the Harts Range, central Australia: evidence for early Ordovician extension and constraints on Carboniferous metamorphism. Journal of the Geological Society, 156(4): 715-730.
Howlett, D., Hand, M., Raimondo, T., 2015. 120 Myr of episodic mid-crustal metamorphism and fluid-rock interaction during the Alice Springs Orogeny: the Strangways Range, central Australia. Poster session at the TIGeR conference, Curtin University, Perth, Western Australia.
Huston, D. L., Maas, R., Cross, A., Hussey, K. J., Mernagh, T. P., Fraser, G., & Champion, D. C. 2016. The Nolans Bore rare-earth element-phosphorus-uranium mineral system: geology, origin and post-depositional modifications. Mineralium Deposita, 51(6): 797-822.
Lavery, P., 2003. Petrological, stable isotope and geochronological constraints on the metamorphic fluid flow history of the Harts Ranges, central Australia. La Trobe University, PhD thesis.
Maidment, D.W., 2005. Palaeozoic high-grade metamorphism within the Centralian Superbasin, Harts Range region, central Australia. Australian National University, PhD thesis.
Maidment, D.W., Hand, M. and Williams, I.S., 2005. Tectonic cycles in the Strangways Metamorphic Complex, Arunta Inlier, central Australia: geochronological evidence for exhumation and basin formation between two high-grade metamorphic events. Australian Journal of Earth Sciences, 52(2): 205-215.
Maidment, D.W., Hand, M. and Williams, I.S., 2013. High grade metamorphism of sedimentary rocks during Palaeozoic rift basin formation in central Australia. Gondwana Research, 24(3–4): 865-885.
Mawby, J., Hand, M. and Foden, J., 1999. Sm–Nd evidence for high-grade Ordovician metamorphism in the Arunta Block, central Australia. Journal of Metamorphic Geology, 17(6): 653-668.
McLaren, S., Sandiford, M., Dunlap, W. J., Scrimgeour, I., Close, D., & Edgoose, C. 2009. Distribution of Palaeozoic reworking in the Western Arunta Region and northwestern Amadeus Basin from 40Ar/39Ar thermochronology: implications for the evolution of intracratonic basins. Basin Research, 21(3): 315-334.
Möller, A., Armstrong, R., Hensen, B. and Williams, I., 1999a. Dating metamorphic events & deformation: Shrimp U–Pb zircon examples from the Strangways Metamorphic Complex, Arunta Inlier, Australia. European Union of Geosciences 10, Strasbourg, Journal of Conference Abstracts, 4: 711.
Möller, A., Williams, I.S., Jackson, S., and Hensen, B.J., 1999b. Palaeozoic deformation and mineral growth in the Strangways Metamorphic Complex: in-situ dating of zircon and monazite in a staurolite–corundum bearing shear zone. Geological Society of Australia Abstracts, 54: 71-72.
Mortimer, G. E., Cooper, J. A., & James, P. R. 1987. U/Pb and Rb/Sr geochronology and geological evolution of the Harts Range ruby mine area of the Arunta Inlier, central Australia. Lithos, 20(6): 445-467.
Raimondo, T., Clark, C., Hand, M., Cliff, J. and Harris, C., 2012. High-resolution geochemical record of fluid–rock interaction in a mid-crustal shear zone: a comparative study of major element and oxygen isotope transport in garnet. Journal of Metamorphic Geology, 30(3): 255-280.
Schoneveld, L., Spandler, C., & Hussey, K. 2015. Genesis of the central zone of the Nolans Bore rare earth element deposit, Northern Territory, Australia. Contributions to Mineralogy and Petrology, 170(2): 1-22.
Scrimgeour, I. and Raith, J.G., 2001. High-grade reworking of Proterozoic granulites during Ordovician intraplate transpression, eastern Arunta Inlier, central Australia. Geological Society, London, Special Publications, 184(1): 261-287.
Wade, B.P., Hand, M., Maidment, D.W., Close, D.F. and Scrimgeour, I.R., 2008. Origin of metasedimentary and igneous rocks from the Entia Dome, eastern Arunta region, central Australia: a U–Pb LA–ICPMS, SHRIMP and Sm–Nd isotope study. Australian Journal of Earth Sciences, 55(5): 703-719.
